# Supplementary material for: APTC-EC-2A: A Lytic Phage Targeting Multidrug Resistant E. coli Planktonic Cells and Biofilms
Source: MDPI journal article supplement (doi:10.3390/microorganisms10010102), 2022-01-04
Supplement: s1 [file s1]

Supplementary:

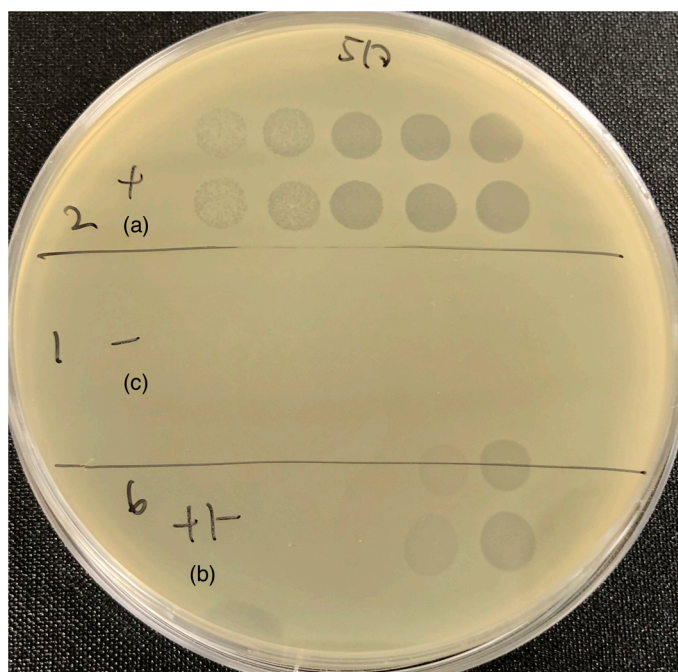

**Figure S1. Susceptibility of *E. coli* to phage lysis.** Representative LB agar plate showing the three categories of phage spots: (a) clear, (b) turbid and (c) no reaction; denoting sensitive, semi-sensitive and resistance to phage respectively.

**Table S1.** The annotation information, such as position, direction and functions of each gene and conserved proteins.

| Type | Start | End   | Strand | Attributes                                                    |
|------|-------|-------|--------|---------------------------------------------------------------|
| CDS  | 1     | 2,178 | -      | CDS_1_rIIA lysis inhibitor                                    |
| CDS  | 2,189 | 2,392 | -      | CDS_2_topoisomerase                                           |
| CDS  | 2,447 | 4,264 | -      | CDS_3_DNA gyrase subunit B                                    |
| CDS  | 4,203 | 4,607 | +      | CDS_4_hypothetical protein                                    |
| CDS  | 4,600 | 4,971 | -      | CDS_5_hypothetical protein                                    |
| CDS  | 4,974 | 5,150 | -      | CDS_6_hypothetical protein                                    |
| CDS  | 5,153 | 5,566 | -      | CDS_7_mRNA metabolism modulator goF                           |
| CDS  | 5,566 | 5,781 | -      | CDS_8_modifier of suppressor tRNAs                            |
| CDS  | 5,799 | 5,888 | +      | CDS_9_Transcription regulatory protein motB                   |
| CDS  | 5,954 | 6,445 | -      | CDS_10_modifier of transcription                              |
| CDS  | 6,522 | 7,067 | -      | CDS_11_transcription regulator MotB domain-containing protein |
| CDS  | 7,070 | 7,570 | -      | CDS_12_exodeoxyribonuclease                                   |

|     |        |        |   |                                                 |
|-----|--------|--------|---|-------------------------------------------------|
| CDS | 7,634  | 8,317  | - | CDS_13_exonuclease A                            |
| CDS | 8,317  | 8,559  | - | CDS_14_hypothetical protein                     |
| CDS | 8,552  | 8,797  | - | CDS_15_ATP-dependent DNA helicase dda           |
| CDS | 8,784  | 9,044  | - | CDS_16_hypothetical protein                     |
| CDS | 9,051  | 10,370 | - | CDS_17_hypothetical protein                     |
| CDS | 10,367 | 10,678 | - | CDS_18_hypothetical protein                     |
| CDS | 10,680 | 11,426 | - | CDS_19_ADP-ribosyltransferase modB              |
| CDS | 11,549 | 12,151 | - | CDS_20_ADP-ribosyltransferase modB              |
| CDS | 12,148 | 12,771 | - | CDS_21_ADP-ribosylase                           |
| CDS | 12,839 | 13,021 | - | CDS_22_hypothetical protein                     |
| CDS | 13,030 | 13,500 | - | CDS_23_hypothetical protein                     |
| CDS | 13,493 | 13,645 | - | CDS_24_molybdenum ABC transporter               |
| CDS | 13,654 | 13,839 | - | CDS_25_transcription modulator                  |
| CDS | 13,832 | 14,317 | - | CDS_26_transcription modulator under heat shock |
| CDS | 14,326 | 14,667 | - | CDS_27_hypothetical protein                     |
| CDS | 14,667 | 14,873 | - | CDS_28_small outer capsid protein               |
| CDS | 14,854 | 14,976 | - | CDS_29_small outer capsid protein               |
| CDS | 14,969 | 15,214 | - | CDS_30_capsid and scaffold protein              |
| CDS | 15,231 | 15,440 | - | CDS_31_small outer capsid protein               |
| CDS | 15,437 | 15,631 | - | CDS_32_small outer capsid protein               |
| CDS | 15,631 | 16,149 | - | CDS_33_dCTP pyrophosphatase                     |
| CDS | 16,210 | 16,989 | - | CDS_34_DNA adenine methyltransferase            |
| CDS | 16,989 | 17,549 | - | CDS_35_hypothetical protein                     |
| CDS | 17,568 | 17,657 | - | CDS_36_hypothetical protein                     |
| CDS | 17,649 | 17,849 | + | CDS_37_DNA primase                              |
| CDS | 17,846 | 18,874 | - | CDS_38_putative DNA primase catalytic core      |
| CDS | 18,877 | 19,041 | - | CDS_39_hypothetical protein                     |
| CDS | 19,043 | 19,399 | - | CDS_40_hypothetical protein                     |
| CDS | 19,401 | 20,027 | - | CDS_41_spackle protein                          |
| CDS | 20,027 | 20,320 | - | CDS_42_spackle periplasmic protein              |
| CDS | 20,379 | 20,636 | - | CDS_43_hypothetical protein                     |
| CDS | 20,638 | 20,820 | - | CDS_44_discriminator of mRNA degradation        |
| CDS | 20,879 | 22,306 | - | CDS_45_replicative DNA helicase                 |
| CDS | 22,316 | 22,660 | - | CDS_46_head vertex assembly chaperone           |
| CDS | 22,653 | 23,834 | - | CDS_47_RecA-like recombination protein          |

|     |        |        |   |                                                              |
|-----|--------|--------|---|--------------------------------------------------------------|
| CDS | 23,912 | 24,754 | - | CDS_48_thymidylate synthase                                  |
| CDS | 24,751 | 25,491 | - | CDS_49_deoxycytidylate 5-hydroxymethyltransferase            |
| CDS | 25,499 | 25,648 | - | CDS_50_hypothetical protein                                  |
| CDS | 25,645 | 25,896 | - | CDS_51_immunity to superinfection membrane protein           |
| CDS | 25,904 | 26,284 | - | CDS_52_hypothetical protein                                  |
| CDS | 26,295 | 26,531 | - | CDS_53_DNA polymerase                                        |
| CDS | 26,714 | 29,410 | - | CDS_54_DNA polymerase                                        |
| CDS | 29,489 | 29,857 | - | CDS_55_translational repressor protein                       |
| CDS | 29,859 | 30,422 | - | CDS_56_clamp-loader subunit                                  |
| CDS | 30,424 | 31,383 | - | CDS_57_clamp loader subunit DNA polymerase accessory protein |
| CDS | 31,435 | 32,121 | - | CDS_58_sliding clamp DNA polymerase accessory protein        |
| CDS | 32,177 | 32,566 | - | CDS_59_RNA polymerase binding protein                        |
| CDS | 32,576 | 32,764 | - | CDS_60_exonuclease subunit                                   |
| CDS | 32,820 | 34,460 | - | CDS_61_recombination endonuclease subunit                    |
| CDS | 34,499 | 34,714 | - | CDS_62_hypothetical protein                                  |
| CDS | 34,686 | 34,949 | - | CDS_63_recombination endonuclease subunit                    |
| CDS | 34,946 | 35,965 | - | CDS_64_recombination endonuclease subunit                    |
| CDS | 35,962 | 36,102 | - | CDS_65_DNA alpha-glucosyltransferase                         |
| CDS | 36,142 | 37,344 | - | CDS_66_DNA alpha-glucosyltransferase                         |
| CDS | 37,411 | 37,524 | - | CDS_67_hypothetical protein                                  |
| CDS | 37,588 | 37,791 | - | CDS_68_hypothetical protein                                  |
| CDS | 37,760 | 38,077 | - | CDS_69_hypothetical protein                                  |
| CDS | 38,079 | 38,297 | - | CDS_70_hypothetical protein                                  |
| CDS | 38,281 | 38,838 | - | CDS_71_RNA polymerase sigma factor                           |
| CDS | 38,917 | 39,186 | - | CDS_72_hypothetical protein                                  |
| CDS | 39,183 | 39,398 | - | CDS_73_hypothetical protein                                  |
| CDS | 39,401 | 39,727 | - | CDS_74_hypothetical protein                                  |
| CDS | 39,780 | 39,980 | - | CDS_75_hypothetical protein                                  |
| CDS | 39,981 | 40,112 | - | CDS_76_hypothetical protein                                  |
| CDS | 40,120 | 40,413 | - | CDS_77_hypothetical protein                                  |
| CDS | 40,406 | 40,588 | - | CDS_78_hypothetical protein                                  |
| CDS | 40,747 | 41,055 | - | CDS_79_glutaredoxin                                          |

|     |        |        |   |                                                                           |
|-----|--------|--------|---|---------------------------------------------------------------------------|
| CDS | 41,058 | 41,270 | - | CDS_80_anaerobic ribonucleoside-triphosphate reductase-activating protein |
| CDS | 41,279 | 41,371 | - | CDS_81_anaerobic ribonucleoside-triphosphate reductase-activating protein |
| CDS | 41,385 | 41,855 | - | CDS_82_Pyruvate formate-lyase 1-activating enzyme                         |
| CDS | 41,852 | 43,669 | - | CDS_83_anaerobic ribonucleoside-triphosphate reductase-activating protein |
| CDS | 43,666 | 44,139 | - | CDS_84_packaging and recombination endonuclease VII                       |
| CDS | 44,181 | 44,357 | - | CDS_85_host protease inhibitor                                            |
| CDS | 44,394 | 44,879 | - | CDS_86_host protease inhibitor                                            |
| CDS | 44,863 | 45,030 | - | CDS_87_hypothetical protein                                               |
| CDS | 45,002 | 45,172 | - | CDS_88_hypothetical protein                                               |
| CDS | 45,175 | 45,390 | - | CDS_89_glutaredoxin                                                       |
| CDS | 45,387 | 45,650 | - | CDS_90_glutaredoxin                                                       |
| CDS | 45,652 | 45,894 | - | CDS_91_thioredoxin                                                        |
| CDS | 45,881 | 46,195 | - | CDS_92_thioredoxin                                                        |
| CDS | 46,192 | 47,121 | - | CDS_93_thioredoxin                                                        |
| CDS | 47,174 | 48,175 | - | CDS_94_thioredoxin                                                        |
| CDS | 48,233 | 49,255 | - | CDS_95_thioredoxin                                                        |
| CDS | 49,264 | 50,151 | - | CDS_96_thioredoxin                                                        |
| CDS | 50,163 | 50,567 | - | CDS_97_thioredoxin                                                        |
| CDS | 50,623 | 51,150 | - | CDS_98_thioredoxin                                                        |
| CDS | 51,211 | 51,513 | - | CDS_99_thioredoxin                                                        |
| CDS | 51,615 | 52,583 | - | CDS_100_thioredoxin                                                       |
| CDS | 52,699 | 53,712 | - | CDS_101_hypothetical protein                                              |
| CDS | 53,709 | 54,170 | - | CDS_102_hypothetical protein                                              |
| CDS | 54,173 | 54,694 | - | CDS_103_hypothetical protein                                              |
| CDS | 54,701 | 55,234 | - | CDS_104_hypothetical protein                                              |
| CDS | 55,261 | 55,365 | - | CDS_105_hypothetical protein                                              |
| CDS | 55,426 | 55,599 | - | CDS_106_hypothetical protein                                              |
| CDS | 55,589 | 55,783 | - | CDS_107_hypothetical protein                                              |
| CDS | 55,786 | 55,989 | - | CDS_108_hypothetical protein                                              |
| CDS | 55,989 | 56,177 | - | CDS_109_hypothetical protein                                              |
| CDS | 56,272 | 56,658 | - | CDS_110_antiholin                                                         |

---

|     |        |        |   |                                                         |
|-----|--------|--------|---|---------------------------------------------------------|
| CDS | 56,655 | 56,948 | - | CDS_111_rI lysis inhibition regulator                   |
| CDS | 56,961 | 57,173 | - | CDS_112_thymidine kinase                                |
| CDS | 57,216 | 57,797 | - | CDS_113_thymidine kinase                                |
| CDS | 57,807 | 57,992 | - | CDS_114_hypothetical protein                            |
| CDS | 57,989 | 58,162 | - | CDS_115_hypothetical protein                            |
| CDS | 58,159 | 58,371 | - | CDS_116_hypothetical protein                            |
| CDS | 58,362 | 58,574 | - | CDS_117_hypothetical protein                            |
| CDS | 58,571 | 59,038 | - | CDS_118_valyl-tRNA ligase modifier                      |
| CDS | 59,035 | 59,376 | - | CDS_119_valyl-tRNA synthetase modifier                  |
| CDS | 59,369 | 59,914 | - | CDS_120_endoribonuclease RegB domain-containing protein |
| CDS | 59,922 | 60,383 | - | CDS_121_endoribonuclease RegB domain-containing protein |
| CDS | 60,443 | 60,721 | - | CDS_122_endoribonuclease RegB domain-containing protein |
| CDS | 60,721 | 60,987 | - | CDS_123_hypothetical protein                            |
| CDS | 60,980 | 61,201 | - | CDS_124_autonomous glycyl radical cofactor              |
| CDS | 61,201 | 61,563 | - | CDS_125_autonomous glycyl radical cofactor              |
| CDS | 61,570 | 61,899 | - | CDS_126_endoribonuclease RegB domain-containing protein |
| CDS | 61,896 | 62,465 | - | CDS_127_endoribonuclease RegB domain-containing protein |
| CDS | 62,581 | 62,997 | - | CDS_128_endonuclease                                    |
| CDS | 63,057 | 63,551 | - | CDS_129_lysozyme murein hydrolase e                     |
| CDS | 63,588 | 64,043 | - | CDS_130_nudix hydrolase                                 |
| CDS | 64,025 | 64,513 | - | CDS_131_hypothetical protein                            |
| CDS | 64,510 | 64,872 | - | CDS_132_hypothetical protein                            |
| CDS | 64,854 | 65,246 | - | CDS_133_hypothetical protein                            |
| CDS | 65,215 | 65,829 | - | CDS_134_hypothetical protein                            |
| CDS | 65,871 | 66,464 | - | CDS_135_hypothetical protein                            |
| CDS | 66,566 | 66,829 | - | CDS_136_hypothetical protein                            |
| CDS | 66,843 | 66,953 | + | CDS_137_hypothetical protein                            |
| CDS | 67,059 | 67,622 | - | CDS_138_hypothetical protein                            |
| CDS | 67,656 | 67,751 | - | CDS_139_hypothetical protein                            |
| CDS | 67,748 | 68,221 | - | CDS_140_hypothetical protein                            |
| CDS | 68,404 | 68,532 | - | CDS_141_hypothetical protein                            |

---

|     |        |        |   |                                                             |
|-----|--------|--------|---|-------------------------------------------------------------|
| CDS | 68,605 | 68,955 | - | CDS_142_hypothetical protein                                |
| CDS | 70,089 | 70,376 | - | CDS_143_hypothetical protein                                |
| CDS | 70,379 | 70,777 | - | CDS_144_hypothetical protein                                |
| CDS | 70,777 | 70,962 | - | CDS_145_hypothetical protein                                |
| CDS | 71,021 | 71,266 | - | CDS_146_hypothetical protein                                |
| CDS | 71,331 | 71,588 | - | CDS_147_hypothetical protein                                |
| CDS | 71,662 | 72,120 | - | CDS_148_hypothetical protein                                |
| CDS | 72,117 | 72,347 | - | CDS_149_tail fiber assembly protein                         |
| CDS | 72,347 | 73,072 | - | CDS_150_deoxynucleotide monophosphate kinase                |
| CDS | 73,122 | 73,652 | - | CDS_151_tail completion and sheath stabilizer protein       |
| CDS | 73,759 | 74,418 | - | CDS_152_putative site-specific intron-like DNA endonuclease |
| CDS | 74,415 | 75,242 | - | CDS_153_putative DNA end protector protein                  |
| CDS | 75,242 | 75,694 | - | CDS_154_head completion protein                             |
| CDS | 75,742 | 76,332 | + | CDS_155_baseplate central spike complex protein             |
| CDS | 76,316 | 78,043 | + | CDS_156_baseplate hub + tail lysozyme                       |
| CDS | 78,018 | 78,572 | + | CDS_157_baseplate puncturing device                         |
| CDS | 78,573 | 78,866 | + | CDS_158_baseplate wedge protein                             |
| CDS | 78,875 | 80,857 | + | CDS_159_baseplate wedge subunit                             |
| CDS | 80,854 | 83,952 | + | CDS_160_baseplate wedge subunit                             |
| CDS | 83,945 | 84,949 | + | CDS_161_baseplate wedge subunit                             |
| CDS | 85,013 | 85,879 | + | CDS_162_baseplate wedge tail fiber connector                |
| CDS | 85,879 | 87,684 | + | CDS_163_baseplate wedge subunit and tail pin                |
| CDS | 87,684 | 88,343 | + | CDS_164_baseplate wedge subunit and tail pin                |
| CDS | 88,340 | 89,797 | + | CDS_165_short tail fiber                                    |
| CDS | 89,801 | 89,890 | + | CDS_166_short tail fiber protein                            |
| CDS | 89,900 | 91,357 | + | CDS_167_fibritin neck whiskers                              |
| CDS | 91,389 | 92,318 | + | CDS_168_head completion, neck hetero-dimeric protein        |
| CDS | 92,320 | 93,090 | + | CDS_169_head completion, neck hetero-dimeric protein        |

|     |         |         |   |                                                         |
|-----|---------|---------|---|---------------------------------------------------------|
| CDS | 93,132  | 93,950  | + | CDS_170_tail sheath stabilizer and completion protein   |
| CDS | 93,959  | 94,453  | + | CDS_171_terminase DNA packaging enzyme small subunit    |
| CDS | 94,437  | 96,269  | + | CDS_172_terminase DNA packaging enzyme large subunit    |
| CDS | 96,301  | 98,280  | + | CDS_173_putative long tail fiber proximal subunit       |
| CDS | 98,397  | 98,888  | + | CDS_174_tail tube protein                               |
| CDS | 98,972  | 100,546 | + | CDS_175_portal vertex protein of head                   |
| CDS | 100,546 | 100,785 | + | CDS_176_prohead core protein                            |
| CDS | 100,785 | 101,210 | + | CDS_177_prohead core protein                            |
| CDS | 101,210 | 101,848 | + | CDS_178_prohead core scaffold protein and protease      |
| CDS | 101,879 | 102,688 | + | CDS_179_prohead core scaffold protein                   |
| CDS | 102,707 | 104,272 | + | CDS_180_putative major capsid protein                   |
| CDS | 104,356 | 105,639 | + | CDS_181_putative precursor of head vertex subunit       |
| CDS | 105,669 | 106,673 | - | CDS_182_RNA ligase                                      |
| CDS | 106,683 | 106,961 | - | CDS_183_hypothetical protein                            |
| CDS | 106,948 | 107,163 | - | CDS_184_highly immunogenic outer capsid protein         |
| CDS | 107,253 | 108,383 | - | CDS_185_large head outer capsid protein                 |
| CDS | 108,393 | 109,073 | - | CDS_186_ATP-dependent DNA helicase uvsW                 |
| CDS | 109,124 | 110,635 | + | CDS_187_ATP-dependent DNA helicase uvsW                 |
| CDS | 110,661 | 110,891 | + | CDS_188_RNA-DNA and DNA-DNA helicase ATPase             |
| CDS | 110,947 | 111,114 | - | CDS_189_hypothetical protein                            |
| CDS | 111,143 | 111,367 | - | CDS_190_recombination protein uvsY                      |
| CDS | 111,367 | 111,780 | - | CDS_191_recombination, repair and ssDNA binding protein |
| CDS | 111,847 | 112,245 | - | CDS_192_baseplate wedge subunit                         |
| CDS | 112,245 | 112,871 | - | CDS_193_putative baseplate hub subunit                  |
| CDS | 112,922 | 113,674 | + | CDS_194_baseplate hub assembly protein                  |
| CDS | 113,671 | 114,843 | + | CDS_195_base plate hub subunit                          |

---

|     |         |         |   |                                                    |
|-----|---------|---------|---|----------------------------------------------------|
| CDS | 114,791 | 115,324 | + | CDS_196_baseplate distal hub subunit               |
| CDS | 115,321 | 117,093 | + | CDS_197_base plate hub                             |
| CDS | 117,102 | 118,196 | + | CDS_198_baseplate tail tube cap                    |
| CDS | 118,196 | 119,161 | + | CDS_199_base plate-tail tube initiator             |
| CDS | 119,190 | 119,480 | - | CDS_200_NAD(+)-arginine ADP-<br>ribosyltransferase |
| CDS | 119,541 | 121,598 | - | CDS_201_NAD(+)-arginine ADP-<br>ribosyltransferase |
| CDS | 121,602 | 123,650 | - | CDS_202_Alt RNA polymerase ADP-<br>ribosylase      |
| CDS | 123,703 | 123,891 | - | CDS_203_DNA ligase                                 |
| CDS | 123,888 | 125,351 | - | CDS_204_DNA ligase                                 |
| CDS | 125,348 | 125,617 | - | CDS_205_hypothetical protein                       |
| CDS | 125,617 | 126,456 | - | CDS_206_hypothetical protein                       |
| CDS | 126,453 | 126,911 | - | CDS_207_hypothetical protein                       |
| CDS | 126,904 | 127,110 | - | CDS_208_hypothetical protein                       |
| CDS | 127,107 | 127,304 | - | CDS_209_hypothetical protein                       |
| CDS | 127,304 | 127,591 | - | CDS_210_hypothetical protein                       |
| CDS | 127,632 | 127,997 | - | CDS_211_hypothetical protein                       |
| CDS | 128,065 | 128,397 | - | CDS_212_hypothetical protein                       |
| CDS | 128,508 | 128,726 | - | CDS_213_lysis inhibition accessory protein         |
| CDS | 128,717 | 128,827 | - | CDS_214_protein rIII                               |
| CDS | 128,832 | 129,014 | - | CDS_215_lysis inhibition accessory protein         |
| CDS | 129,083 | 129,331 | - | CDS_216_lysis inhibition accessory protein         |
| CDS | 129,479 | 129,814 | - | CDS_217_head assembly cochaperone with<br>GroEL    |
| CDS | 129,871 | 130,179 | - | CDS_218_tail fiber protein                         |
| CDS | 130,180 | 130,416 | - | CDS_219_deoxycytidylate deaminase                  |
| CDS | 130,416 | 130,997 | - | CDS_220_dCMP deaminase                             |
| CDS | 130,994 | 131,332 | - | CDS_221_hypothetical protein                       |
| CDS | 131,329 | 131,565 | - | CDS_222_hypothetical protein                       |
| CDS | 131,559 | 132,086 | - | CDS_223_hypothetical protein                       |
| CDS | 132,149 | 132,424 | - | CDS_224_hypothetical protein                       |
| CDS | 132,427 | 132,627 | - | CDS_225_hypothetical protein                       |
| CDS | 132,620 | 132,796 | - | CDS_226_hypothetical protein                       |

---



|     |         |         |   |                                                                            |
|-----|---------|---------|---|----------------------------------------------------------------------------|
| CDS | 132,816 | 133,721 | - | CDS_227_3'-phosphatase, 5'-polynucleotide kinase                           |
| CDS | 133,718 | 134,038 | - | CDS_228_hypothetical protein                                               |
| CDS | 134,035 | 134,265 | - | CDS_229_hypothetical protein                                               |
| CDS | 134,262 | 134,561 | - | CDS_230_Spanin Rz1                                                         |
| CDS | 134,558 | 134,911 | - | CDS_231_Spanin Rz                                                          |
| CDS | 134,902 | 135,408 | - | CDS_232_host transcription inhibitor                                       |
| CDS | 135,470 | 136,594 | - | CDS_233_RNA ligase                                                         |
| CDS | 136,647 | 137,057 | - | CDS_234_endonuclease                                                       |
| CDS | 137,085 | 138,263 | - | CDS_235_ribonucleoside-diphosphate reductase subunit beta                  |
| CDS | 138,315 | 140,579 | - | CDS_236_ribonucleoside-diphosphate reductase subunit alpha                 |
| CDS | 140,570 | 140,896 | - | CDS_237_hypothetical protein                                               |
| CDS | 140,850 | 141,113 | - | CDS_238_thymidylate synthase                                               |
| CDS | 141,110 | 141,970 | - | CDS_239_thymidylate synthase                                               |
| CDS | 142,016 | 142,363 | - | CDS_240_dihydrofolate reductase                                            |
| CDS | 142,383 | 142,964 | - | CDS_241_dihydrofolate reductase                                            |
| CDS | 142,964 | 143,209 | - | CDS_242_hypothetical protein                                               |
| CDS | 143,220 | 143,462 | - | CDS_243_hypothetical protein                                               |
| CDS | 143,601 | 143,966 | - | CDS_244_hypothetical protein                                               |
| CDS | 144,011 | 144,238 | - | CDS_245_hypothetical protein                                               |
| CDS | 144,252 | 144,362 | - | CDS_246_hypothetical protein                                               |
| CDS | 144,383 | 145,291 | - | CDS_247_ssDNA binding, DNA repair, recombination and pre-synthesis protein |
| CDS | 145,391 | 146,029 | - | CDS_248_DNA helicase loader                                                |
| CDS | 146,041 | 146,379 | - | CDS_249_late promoter transcription accessory protein                      |
| CDS | 146,357 | 146,626 | - | CDS_250_dsDNA binding protein                                              |
| CDS | 146,635 | 147,552 | - | CDS_251_DNA polymerase I                                                   |
| CDS | 147,657 | 151,526 | + | CDS_252_proximal tail fiber subunit                                        |
| CDS | 151,535 | 152,650 | + | CDS_253_hinge connector of long tail fiber proximal connector              |
| CDS | 152,713 | 153,363 | + | CDS_254_hinge connector long tail fiber                                    |
| CDS | 153,372 | 156,317 | + | CDS_255_large distal tail fiber subunit                                    |
| CDS | 156,354 | 157,136 | + | CDS_256_tail fiber                                                         |

|      |         |         |   |                                                      |
|------|---------|---------|---|------------------------------------------------------|
| CDS  | 157,167 | 157,823 | + | CDS_257_holin                                        |
| CDS  | 157,824 | 158,096 | - | CDS_258_anti-sigma factor                            |
| CDS  | 158,109 | 158,261 | - | CDS_259_anti-restriction endonuclease                |
| CDS  | 158,258 | 158,536 | - | CDS_260_inhibitor of MrcBC restriction endonuclease  |
| CDS  | 158,620 | 158,751 | - | CDS_261_hypothetical protein                         |
| CDS  | 158,822 | 159,118 | - | CDS_262_anti-restriction nuclease                    |
| CDS  | 159,118 | 159,585 | - | CDS_263_hypothetical protein                         |
| CDS  | 159,582 | 159,737 | - | CDS_264_putative baseplate wedge initiator           |
| CDS  | 159,734 | 160,063 | - | CDS_265_middle transcription regulatory protein motA |
| CDS  | 160,074 | 160,709 | - | CDS_266_activator of middle period transcription     |
| CDS  | 160,815 | 161,042 | - | CDS_267_hypothetical protein                         |
| CDS  | 161,178 | 161,327 | - | CDS_268_topoisomerase                                |
| CDS  | 161,324 | 162,652 | - | CDS_269_DNA topoisomerase II medium subunit          |
| CDS  | 162,657 | 162,797 | - | CDS_270_hypothetical protein                         |
| CDS  | 162,790 | 162,948 | - | CDS_271_acridine resistance protein                  |
| CDS  | 163,036 | 163,494 | - | CDS_272_nucleoid disruption protein                  |
| CDS  | 163,555 | 163,770 | - | CDS_273_hypothetical protein                         |
| CDS  | 163,779 | 163,886 | - | CDS_274_hypothetical protein                         |
| CDS  | 163,886 | 164,083 | - | CDS_275_hypothetical protein                         |
| CDS  | 164,091 | 164,204 | - | CDS_276_inner membrane protein                       |
| CDS  | 164,270 | 164,368 | - | CDS_277_outer membrane protein                       |
| CDS  | 164,448 | 164,711 | - | CDS_278_hypothetical protein                         |
| CDS  | 164,792 | 165,349 | - | CDS_279_endonuclease                                 |
| CDS  | 165,436 | 165,630 | - | CDS_280_hypothetical protein                         |
| CDS  | 165,659 | 166,597 | - | CDS_281_rIIB lysis inhibitor                         |
| trna | 68,974  | 69,049  | - | tRNA-Arg(TCT)                                        |
| trna | 69,054  | 69,129  | - | tRNA-His(GTG)                                        |
| trna | 69,244  | 69,318  | - | tRNA-Asn(GTT)                                        |
| trna | 69,323  | 69,409  | - | tRNA-Tyr(GTA)                                        |
| trna | 69,419  | 69,493  | - | tRNA-Ile2(CAT)                                       |
| trna | 69,495  | 69,570  | - | tRNA-Thr(TGT)                                        |
| trna | 69,576  | 69,665  | - | tRNA-Ser(TGA)                                        |

|      |        |        |   |               |
|------|--------|--------|---|---------------|
| trna | 69,668 | 69,741 | - | tRNA-Pro(TGG) |
| trna | 69,752 | 69,825 | - | tRNA-Gly(TCC) |
| trna | 69,831 | 69,917 | - | tRNA-Leu(TAA) |
| trna | 69,919 | 69,991 | - | tRNA-Gln(TTG) |

---
